# Supplementary material
Source: PubMed Central journal article supplement (PMC5695678)
Supplement: NIHMS905823-supplement-Supplemental_Figure_2.pdf [file NIHMS905823-supplement-Supplemental_Figure_2.pdf]

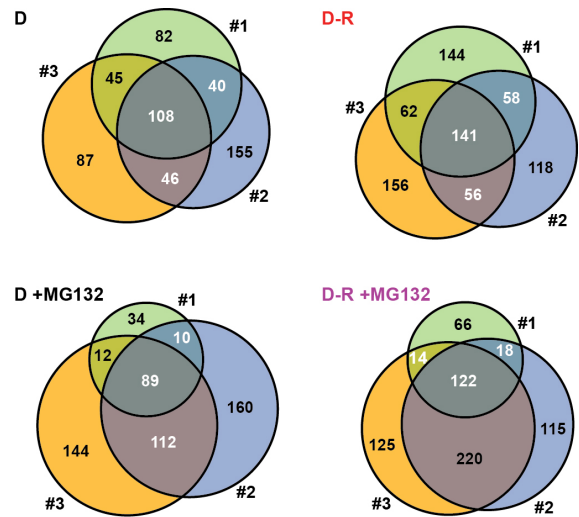

**Supplemental Figure 2.** Venn Diagrams Comparing the MS Datasets from Three Biological Replicates Obtained from Dark Grown *Arabidopsis* Seedlings Before (D) and After Red-Light Irradiation (D-R) and MG132 Exposure. The number of proteins in each sector is indicated.
