# Supplementary material
Source: PubMed Central journal article supplement (PMC5695678)
Supplement: NIHMS905823-supplement-Supplemental_Figure_6.pdf [file NIHMS905823-supplement-Supplemental_Figure_6.pdf]

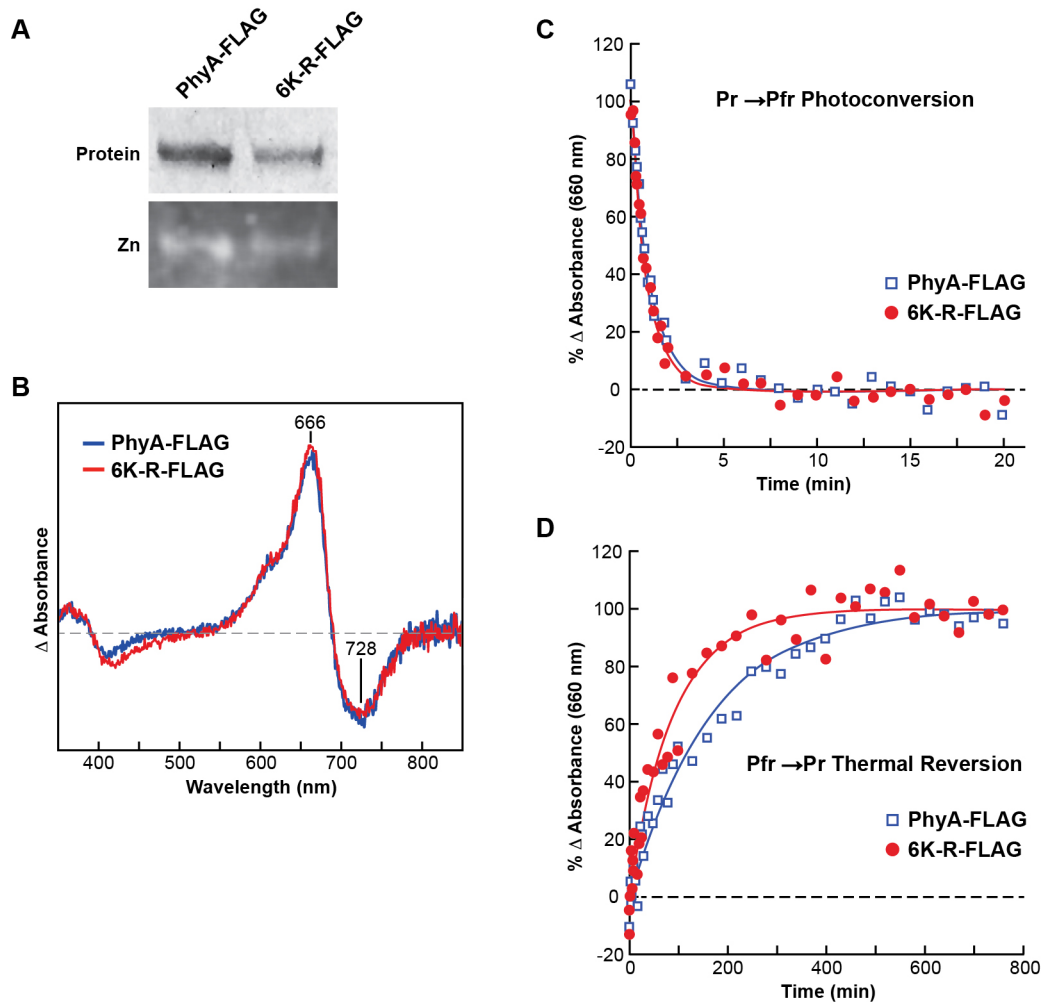

**Supplemental Figure 6.** The 6K-R Mutant of *Arabidopsis* PhyA Binds Phytochromobilin and Displays Near Normal Photochemical Properties.

The WT and 6K-R version of PhyA bearing a C-terminal FLAG tag were expressed in the *phyA-211* background and enriched from 7-d-old etiolated seedling extracts using anti-FLAG beads.

**(A)** 6K-R PhyA polypeptide binds phytochromobilin. The affinity-purified samples were subjected to SDS-PAGE and either stained for protein with Coomassie Blue or assayed for the bound bilin by zinc (Zn)-induced fluorescence under UV light.

**(B)** FR-minus-R difference absorption spectra of the samples. Difference maxima are indicated.

**(C)** Pr  $\rightarrow$  Pfr photoconversion rates during irradiation of dark-adapted Pr samples with 660-nm light. Loss of Pr absorption was monitored at 660 nm.

**(D)** Pfr  $\rightarrow$  Pr thermal reversion rates of Pfr-enriched samples generated by R irradiation. Gain of Pr absorption was monitored at 660 nm. Samples in (B-D) were maintained at 25°C.
