# Supplementary material
Source: PubMed Central journal article supplement (PMC5695678)
Supplement: NIHMS905823-supplement-Supplemental_Table_1.pdf [file NIHMS905823-supplement-Supplemental_Table_1.pdf]

## SUPPLEMENTAL DATA

### Mass Spectrometric Analyses Reveal a Central Role For Ubiquitylation in Remodeling the *Arabidopsis* Proteome During Photomorphogenesis

Victor M. Aguilar-Hernández, Do-Young Kim, Robert J. Stankey, Mark Scalf, Lloyd M. Smith, and Richard D. Vierstra

#### Supplemental Table 1.

#### Nucleotide Sequences of the Oligonucleotide Primers used in this Study.

##### Mutagenic Primers for Introducing the K-R Mutations:

**K65-R:** CCACCAAGGTCTGACAGAGTTACCACGACTTAT

ATAAGTCGTGGTAACTCTGTCAGACCTTGGTGG

**K92-R:** TTAAGTGCCTTGGATGAGAGGACCTTCAAAGTTATTGCA

TGCAATAACTTTGAAGGTCCTCTCATCCAAGGCAAGTAA

**K143-R:** GCGTCTGCATTGCAGAGAGCCCTTGGATTTGGA

TCCAATCCAAGGGCTCTCTGCAATGCAGACGC

**K206-R:** TACAAGCTCGCTGCCAGAGCAATCACTAGGCTG

CAGCCTAGTGATTGCTCTGGCAGCGAGCTTGTA

**K603-R:** ACAAAGGTCATTTACTCGAGGCTAAATGATCTCAAATT

AATTTTGAATCATTAGCCTCGAGTAAATGACCTTTGT

**K942-R:** AGCGCGTTATGTCAGAGGCAACTAAGCAAGATC

GATCTTGCTTAGTTGCCTCTGACATAACGCGCT
