# Supplementary material
Source: PubMed Central journal article supplement (PMC5695678)
Supplement: NIHMS905823-supplement-Supplemental_Table_2.pdf [file NIHMS905823-supplement-Supplemental_Table_2.pdf]

## Supplemental Table 2. Ubiquitylated Arabidopsis Transcription Factors Identified by MS

### *Etiolated Seedlings* (this report)

| Locus     | Other Name  | Description                                                                | Condition | Ub-Footprints | Identified in Green Seedling |
|-----------|-------------|----------------------------------------------------------------------------|-----------|---------------|------------------------------|
| At1g28460 | AGL59       | AGAMOUS-like 59                                                            | R+MG      | Yes           |                              |
| At2g33860 | ARF3, ETT   | Auxin response transcription factor 3                                      | R+MG      |               |                              |
| At4g35040 | BZIP19      | Basic-region leucine zipper (bZIP19) transcription factor                  | D, R      |               |                              |
| At2g24500 | FZF         | C2H2 zinc finger protein                                                   | R+MG      |               |                              |
| At2g28200 |             | C2H2-type zinc finger family protein                                       | R         | Yes           |                              |
| At3g47500 | CDF3        | CYCLING DOF FACTOR 3, Dof-type zinc finger domain-containing protein       | D, R      | Yes           |                              |
| At5g65130 |             | DREB subfamily A-6 of ERF/AP2 transcription factor family                  | D, R      | Yes           |                              |
| At1g10200 | WLIM1       | GATA type zinc finger transcription factor family protein                  | D, R      |               | Yes                          |
| At5g65410 | HB25, ZHD1  | Homeobox protein 25, zinc finger homeodomain transcriptional factor family | R         |               |                              |
| At1g34650 | HDG10       | Homeobox-leucine zipper family protein                                     | R+MG      | Yes           |                              |
| At5g25220 | KNAT3       | Knotted1-like homeobox gene 3                                              | R+MG      |               |                              |
| At3g62610 | MYB11, PFG2 | Myb domain protein 11                                                      | R+MG      |               |                              |
| At2g24590 | RSZ22a      | RS-containing zinc finger protein 22A                                      | R         |               |                              |
| At1g50600 | SCL5        | Scarecrow-like 5                                                           | R+MG      |               |                              |
| At4g29000 |             | Tesmin/TSO1-like CXC domain-containing protein                             | R         |               |                              |
| At2g47900 | TLP3        | TUBBY LIKE PROTEIN 3                                                       | R         |               |                              |
| At2g30620 |             | Winged-helix DNA-binding transcription factor family protein               | R         |               |                              |
| At4g39410 | WRKY13      | WRKY transcription factor 13                                               | D+MG      |               |                              |
| At1g68150 | WRKY9       | WRKY transcription Factor 9                                                | R         |               |                              |

### *Green Seedlings* (Kim *et al.*, 2013)

| Locus     | Other name    | Description                                                   |
|-----------|---------------|---------------------------------------------------------------|
| At3g53500 | RSZ32, RS2Z32 | Arginine/serine-rich zinc knuckle-containing protein 32       |
| At2g37340 | RSZ33         | Arginine/serine-rich zinc knuckle-containing protein 33       |
| At1g10200 | WLIM1         | GATA type zinc finger transcription factor family protein     |
| At3g58780 | AGL1, SHP1    | K-box region and MADS-box transcription factor family protein |
| At1g23860 | RSZP21        | RS-containing zinc finger protein 21; protein binding         |
| At1g68800 | TCP12, BRC2   | TCP transcription factor, TCP DOMAIN PROTEIN 12               |
| At1g11950 |               | Transcription factor Jumonji (jmjC) domain-containing protein |
| At1g02080 |               | Transcription regulator                                       |
| At1g46480 | WOX4          | WUSCHEL-related homeobox 4                                    |
